# Supplementary material for: Radiometal-Based PET/MRI Contrast Agents for Sensing Tumor Extracellular pH
Source: MDPI journal article supplement (doi:10.3390/bios12020134), 2022-02-20
Supplement: s1 [file s1]

Supplementary Materials

# Radiometal-Based PET/MRI Contrast Agents for Sensing Tumor Extracellular pH

Alyssa C. Pollard <sup>1,2</sup>, Jorge de la Cerda <sup>2</sup>, F. William Schuler <sup>2</sup>, Tyler R. Pollard <sup>3</sup>, Aikaterini Kotrotsou <sup>2</sup>, Federica Pisaneschi <sup>2</sup> and Mark D. Pagel <sup>2,\*</sup>

<sup>1</sup> Department of Chemistry, Rice University, Houston, TX 77005, USA; acp4@rice.edu

<sup>2</sup> Department of Cancer Systems Imaging, MD Anderson Cancer Center, Houston, TX 77054, USA; jorge.de-lacerda@mdanderson.org (J.d.l.C.); fschuler@mdanderson.org (F.W.S.); aikaterini.kotrotsou@gmail.com (A.K.); fpisaneschi@mdanderson.org (F.P.)

<sup>3</sup> Department of Chemistry and Biochemistry, Georgia Institute of Technology, Atlanta, GA 30332, USA; polko987@outlook.com

\* Correspondence: mdpagel@mdanderson.org; Tel.: +001-(713)-205-8515

## 1. NMR Spectra of Synthesized Compounds

**Citation:** Pollard, A.C.; de la Cerda, J.; Schuler, W.; Pollard, T.R.; Kotrotsou, A.; Pisaneschi, F.; Pagel, M.D. Radiometal-Based PET/MRI Contrast Agents for Sensing Tumor Extracellular pH. *Biosensors* **2022**, *12*, 134. <https://doi.org/10.3390/bios12020134>

Received: 22 December 2021

Accepted: 16 February 2022

Published: 20 February 2022

**Publisher's Note:** MDPI stays neutral with regard to jurisdictional claims in published maps and institutional affiliations.

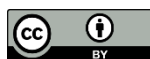

**Copyright:** © 2022 by the authors. Licensee MDPI, Basel, Switzerland. This article is an open access article distributed under the terms and conditions of the Creative Commons Attribution (CC BY) license (<https://creativecommons.org/licenses/by/4.0/>).

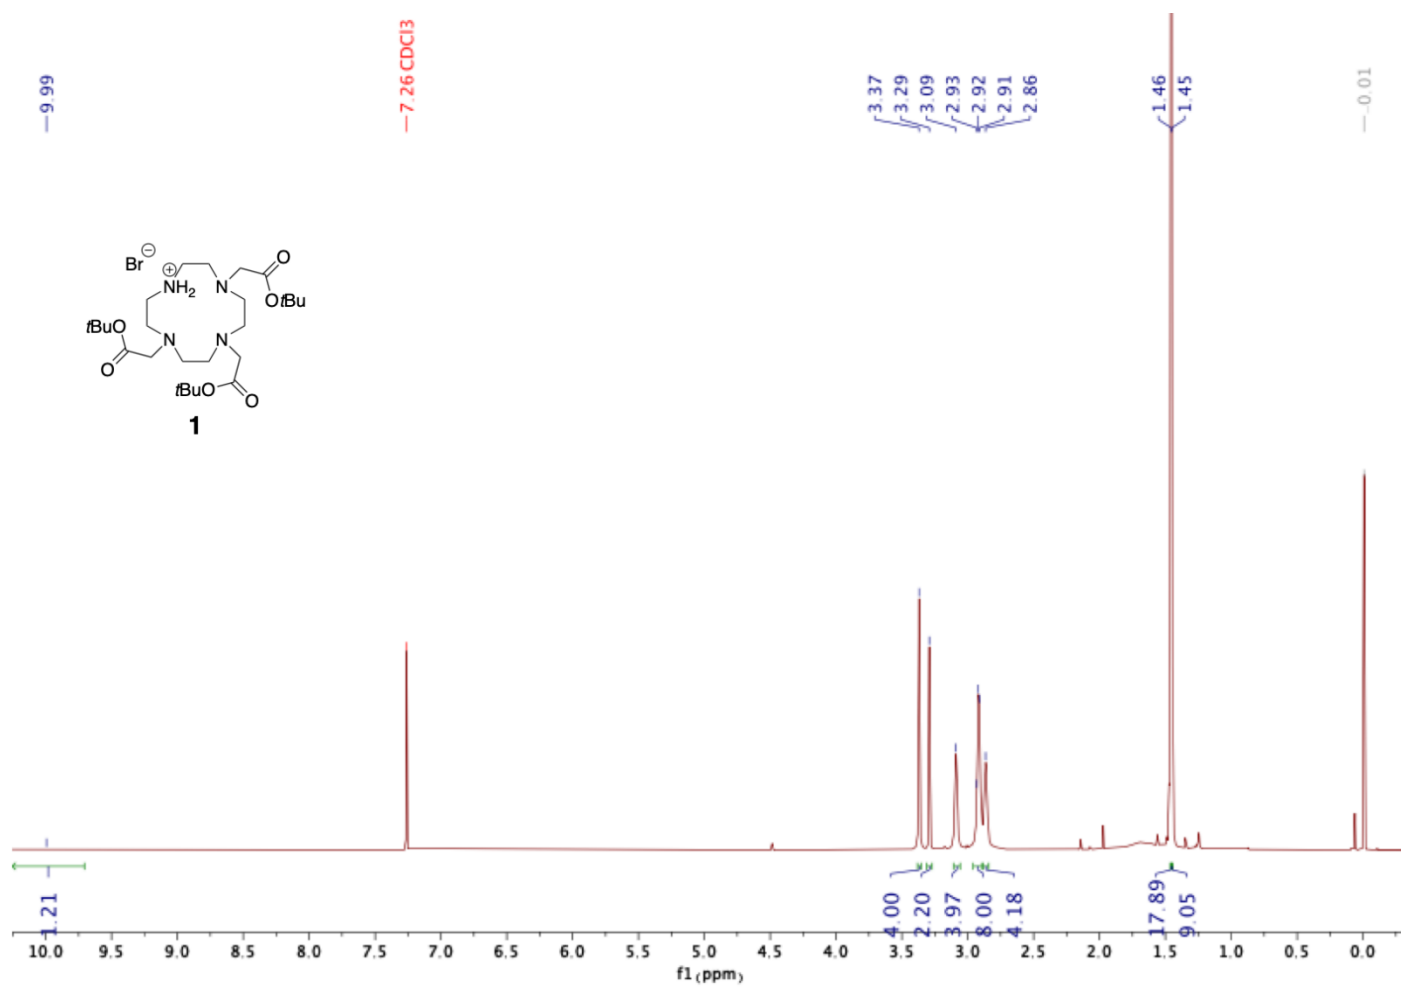

Figure S1. NMR spectrum of compound **1**.

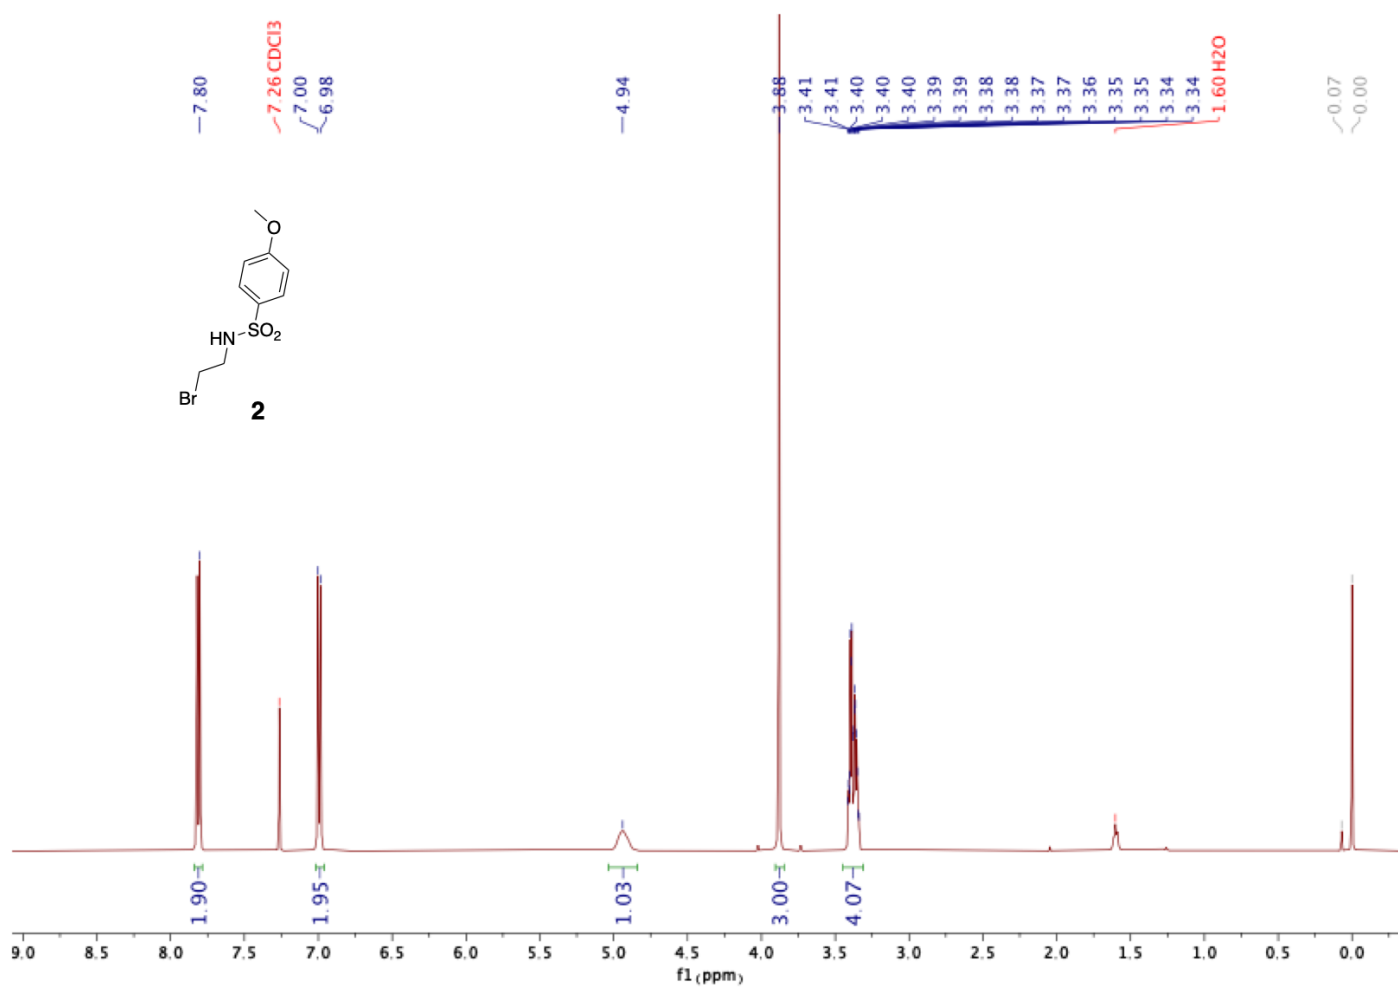

Figure S2. NMR of compound 2.

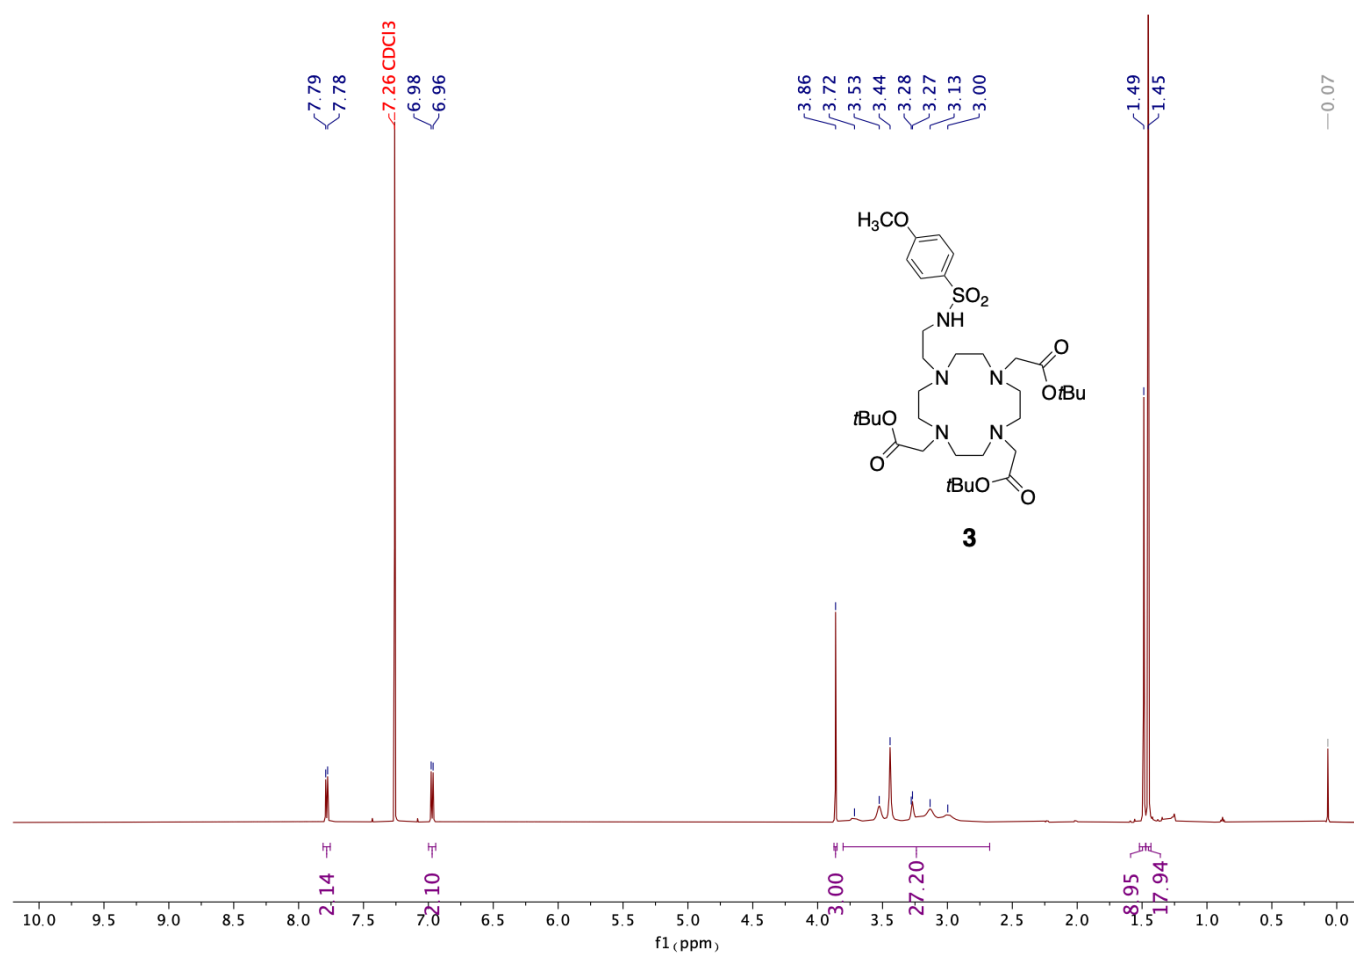Figure S3. NMR of compound **3**.

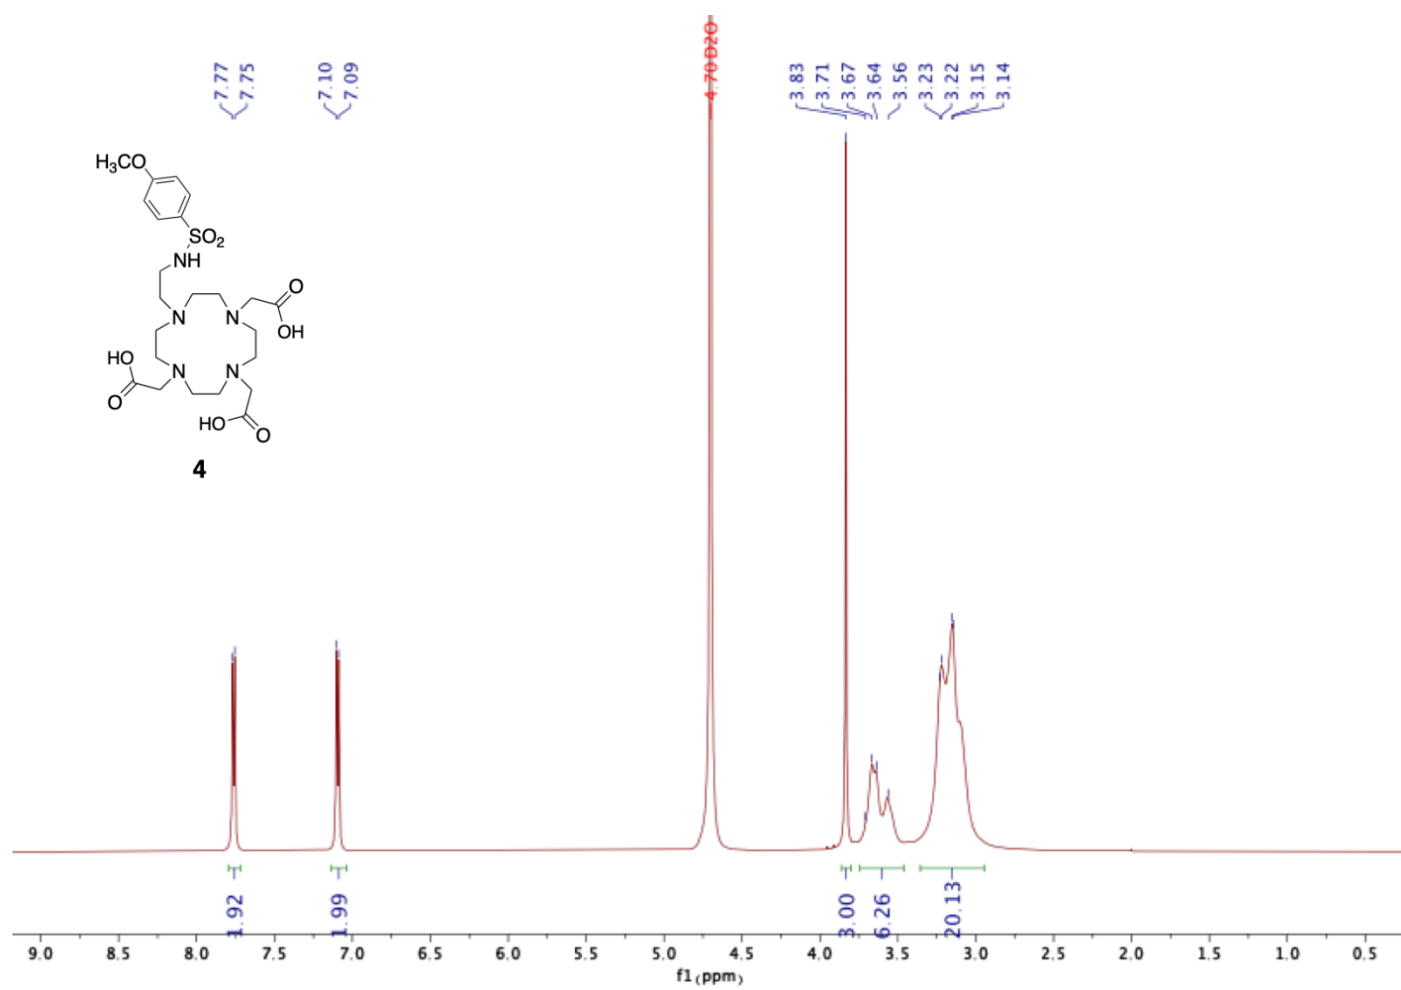

Figure S4. NMR of compound 4.

## 2. LRMS of Synthesized Compounds

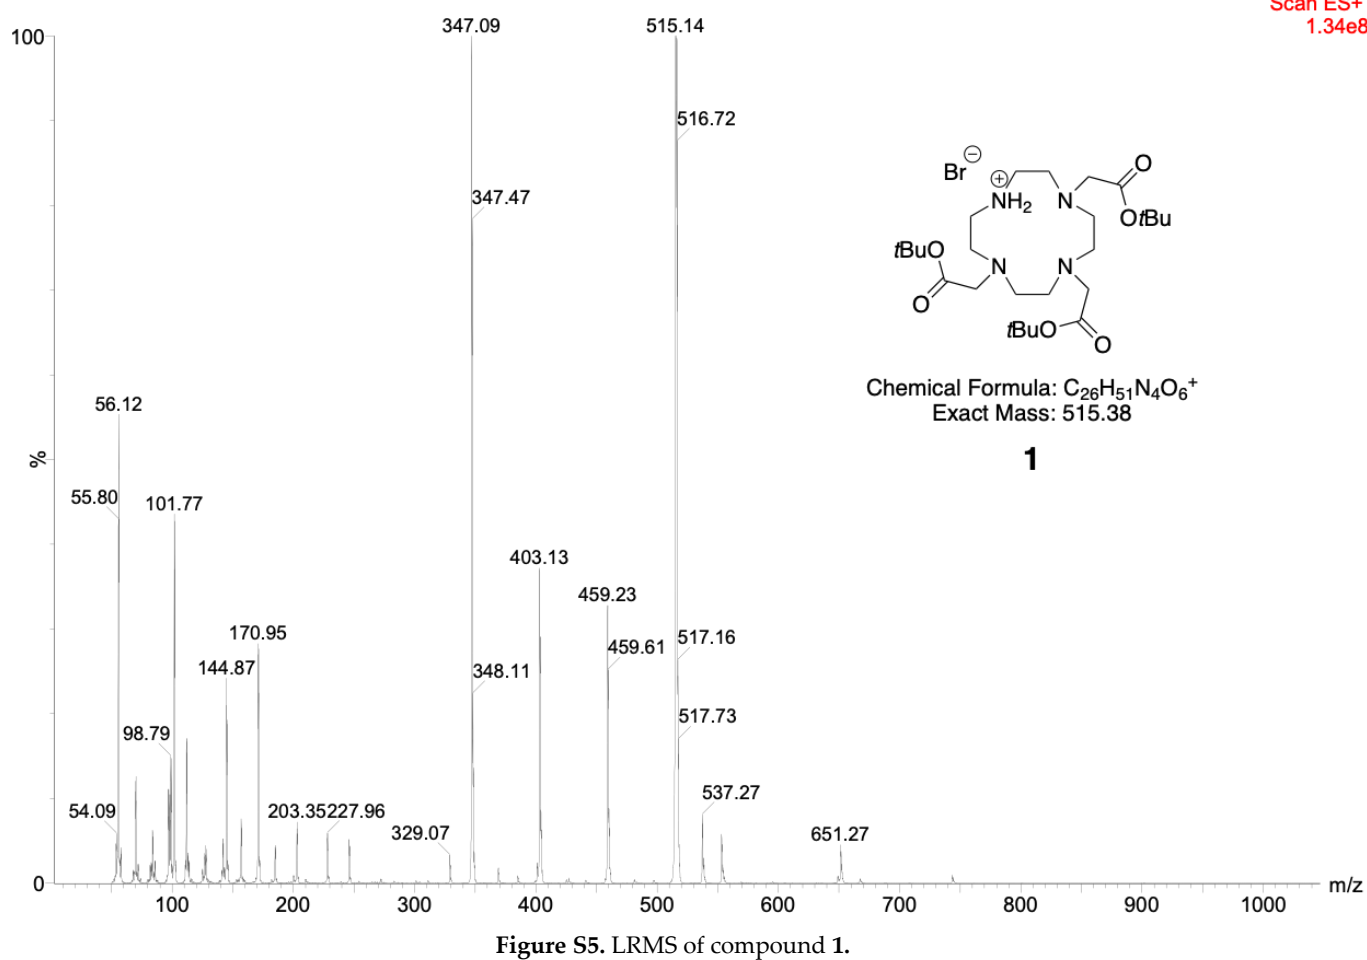

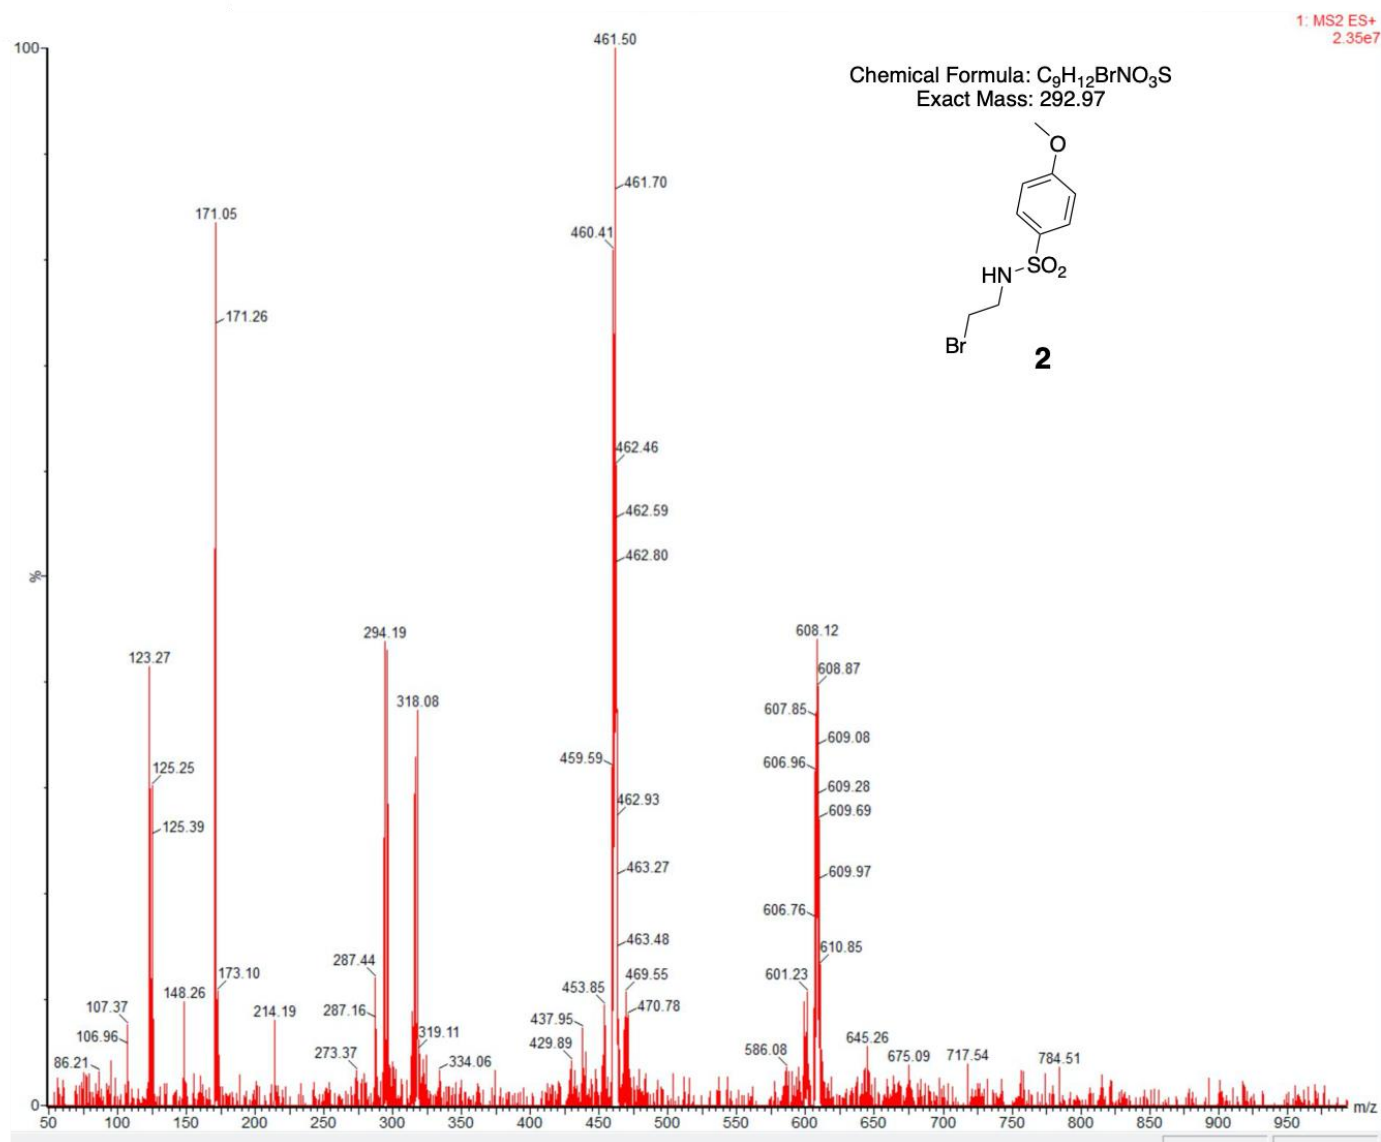

Figure S6. LRMS of compound 2.

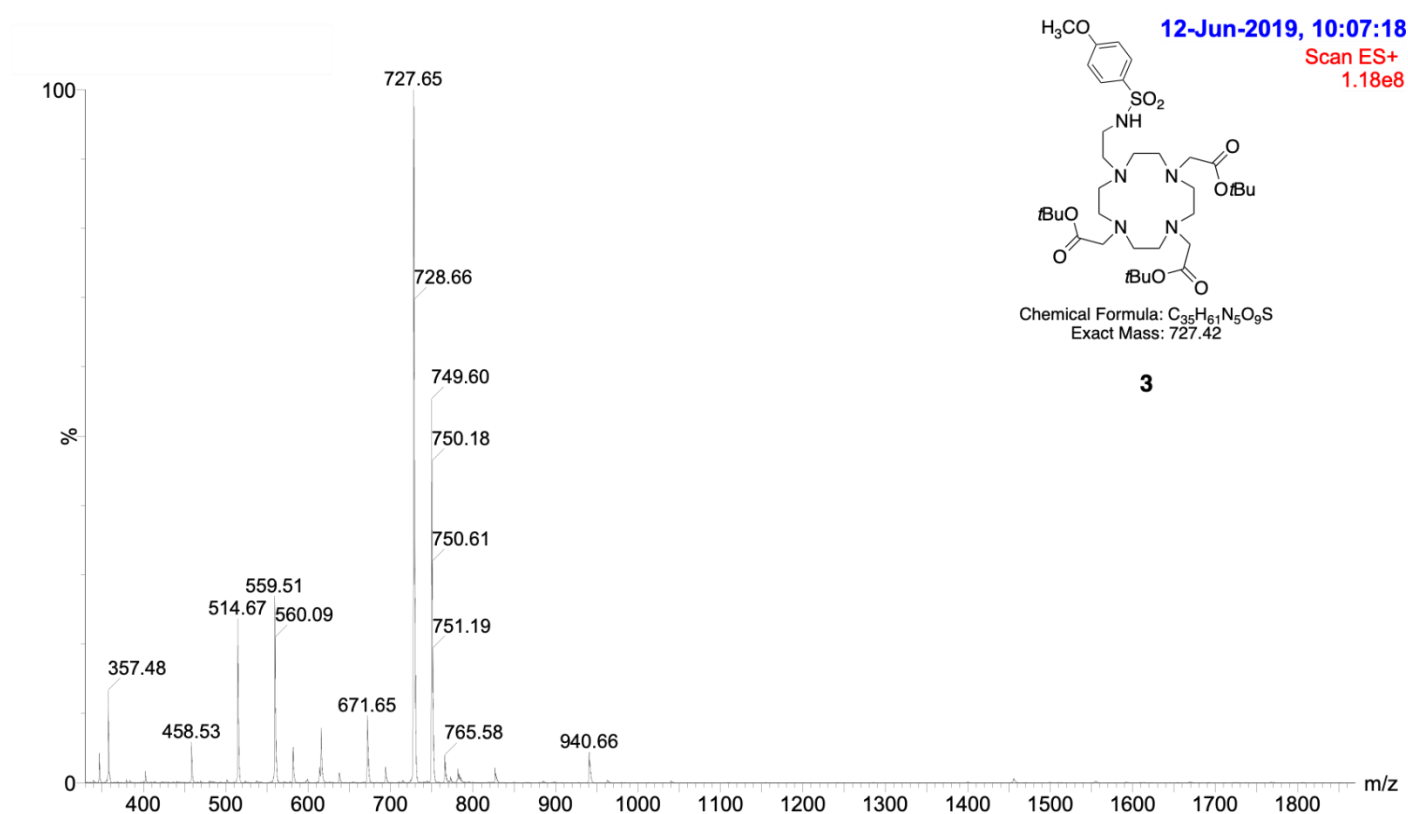

Figure S7. LRMS of compound 3.

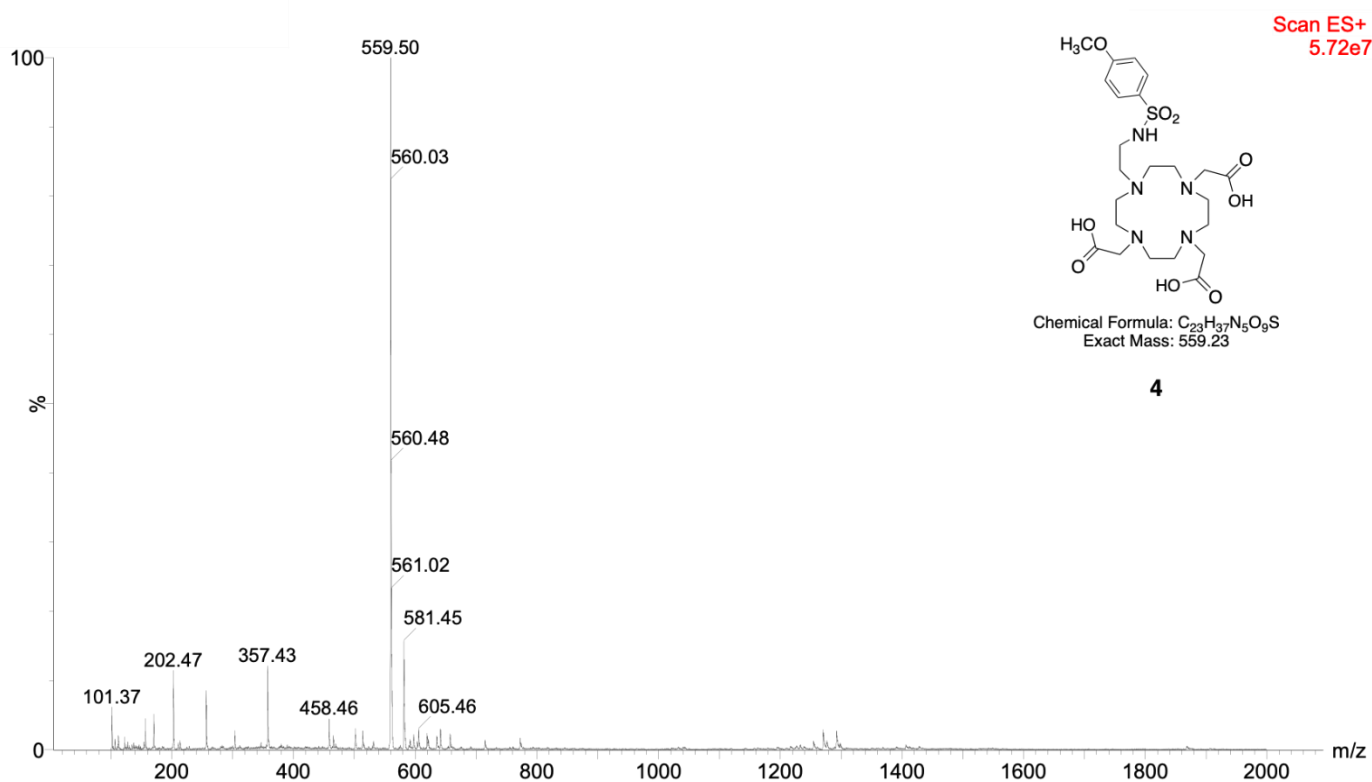

Figure S8. LRMS of compound 4.



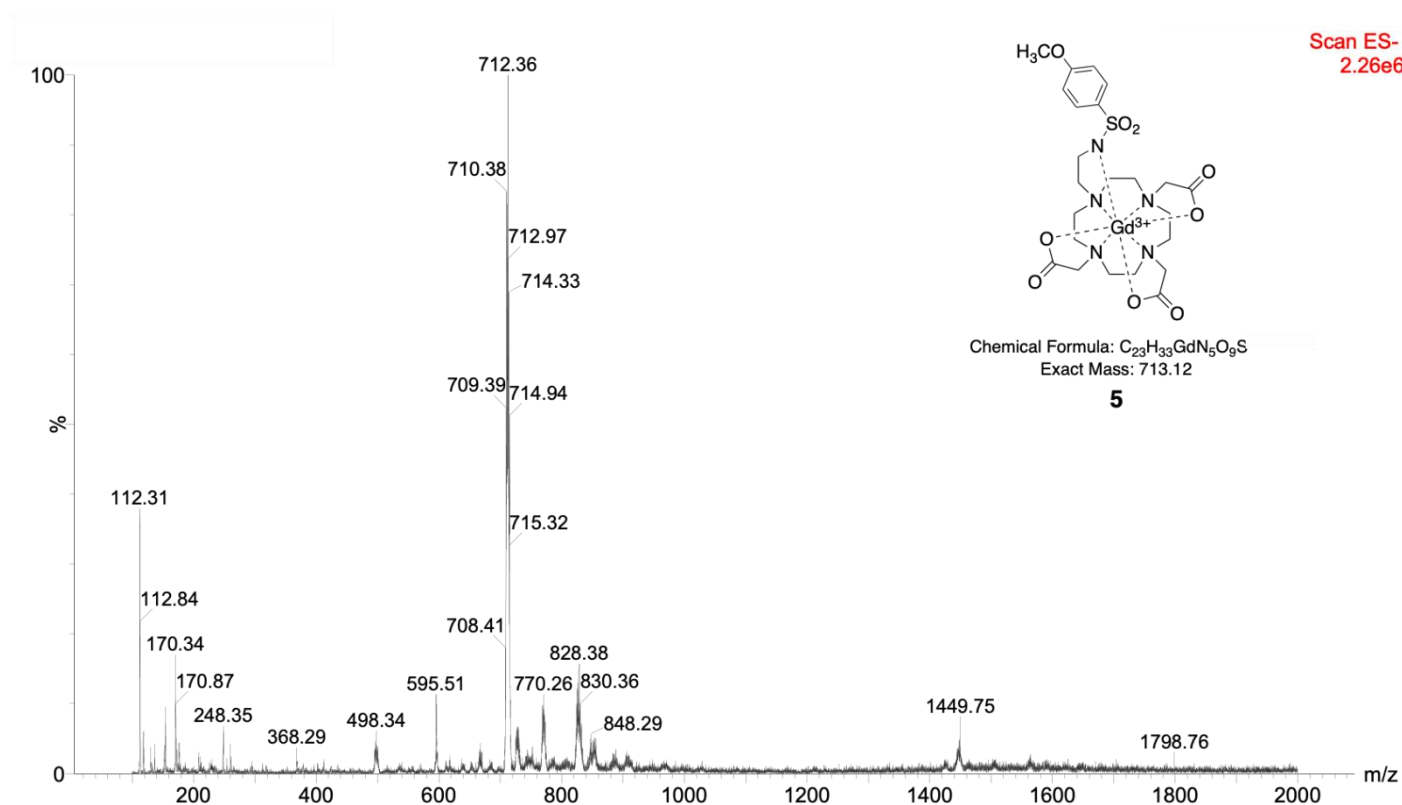

Figure S9. LRMS of compound 5.

### 3. RadioHPLC Traces of PET Co-Agents

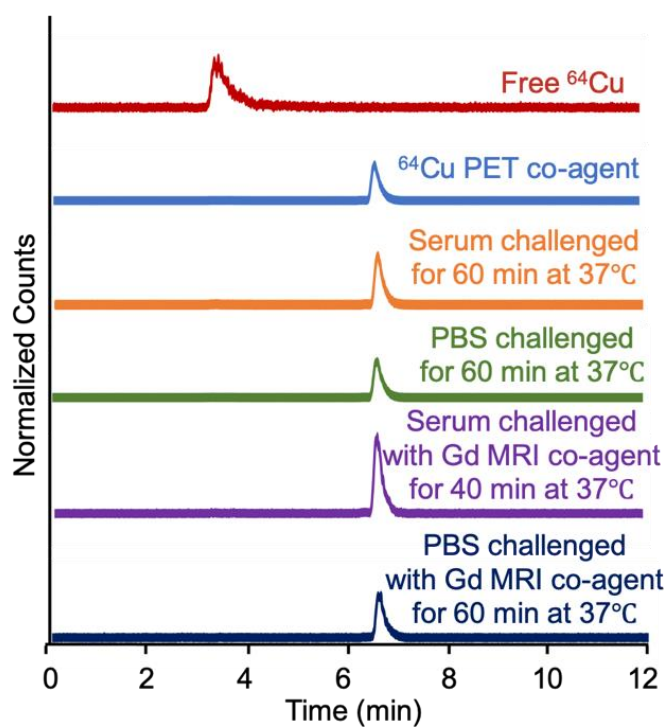

**Figure S10.** RadioHPLC trace of  $^{64}\text{Cu}$  PET co-agent when challenged in solution. The  $^{64}\text{Cu}$  PET co-agent (blue trace) was incubated in human serum (orange trace) and PBS (green trace) for one hour at  $37^\circ\text{C}$  and showed complete stability with no presence of free  $^{64}\text{Cu}$  (red trace). The  $^{64}\text{Cu}$  PET co-agent was also incubated in the presence of the MRI co-agent in serum (purple trace) and PBS (dark blue trace) and showed complete stability.

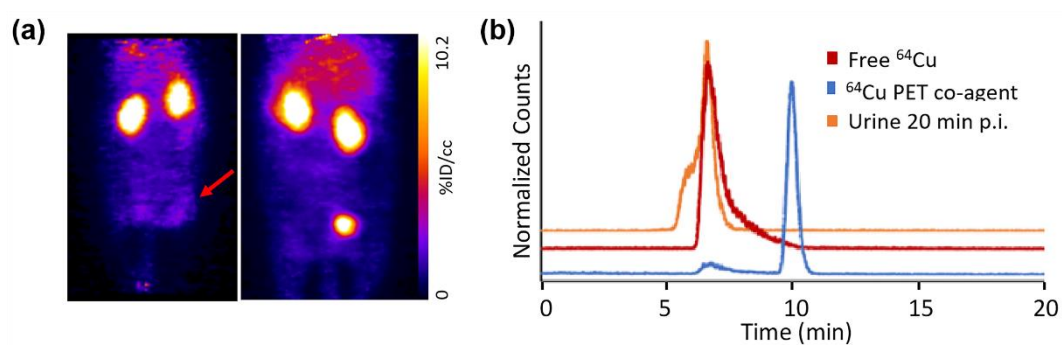

**Figure S11.** Metabolism of the  $^{64}\text{Cu}$  PET co-agent. (a) A PET image from the dynamic PET/MRI scan using the  $^{64}\text{Cu}$  PET co-agent showed poor tumor uptake and high liver uptake. (b) RadioHPLC of urine collected from the mouse after the dynamic PET/MRI scan (orange trace) showed the presence of only free  $^{64}\text{Cu}$  (red trace) rather than showing the intact  $^{64}\text{Cu}$  PET co-agent (blue trace), indicating *in vivo* de-chelation of the  $^{64}\text{Cu}$  PET co-agent.
